# Crystal Structures of the ATPase Domains of Four Human Hsp70 Isoforms: HSPA1L/Hsp70-hom, HSPA2/Hsp70-2, HSPA6/Hsp70B', and HSPA5/BiP/GRP78

Magdalena Wisniewska, Tobias Karlberg, Lari Lehtiö<sup>‡</sup>, Ida Johansson, Tetyana Kotenyova, Martin Moche, Herwig Schüler\*

Structural Genomics Consortium, Karolinska Institutet, Stockholm, Sweden

## Abstract

The 70-kDa heat shock proteins (Hsp70) are chaperones with central roles in processes that involve polypeptide remodeling events. Hsp70 proteins consist of two major functional domains: an N-terminal nucleotide binding domain (NBD) with ATPase activity, and a C-terminal substrate binding domain (SBD). We present the first crystal structures of four human Hsp70 isoforms, those of the NBDs of HSPA1L, HSPA2, HSPA5 and HSPA6. As previously with Hsp70 family members, all four proteins crystallized in a closed cleft conformation, although a slight cleft opening through rotation of subdomain IIB was observed for the HSPA5-ADP complex. The structures presented here support the view that the NBDs of human Hsp70 function by conserved mechanisms and contribute little to isoform specificity, which instead is brought about by the SBDs and by accessory proteins.

**Enhanced version:** This article can also be viewed as an enhanced version in which the text of the article is integrated with interactive 3D representations and animated transitions. Please note that a web plugin is required to access this enhanced functionality. Instructions for the installation and use of the web plugin are available in Text S1.

**Citation:** Wisniewska M, Karlberg T, Lehtiö L, Johansson I, Kotenyova T, et al. (2010) Crystal Structures of the ATPase Domains of Four Human Hsp70 Isoforms: HSPA1L/Hsp70-hom, HSPA2/Hsp70-2, HSPA6/Hsp70B', and HSPA5/BiP/GRP78. PLoS ONE 5(1): e8625. doi:10.1371/journal.pone.0008625

**Editor:** Nick Gay, University of Cambridge, United Kingdom

**Received:** November 9, 2009; **Accepted:** December 14, 2009; **Published:** January 11, 2010

**Copyright:** © 2010 Wisniewska et al. This is an open-access article distributed under the terms of the Creative Commons Attribution License, which permits unrestricted use, distribution, and reproduction in any medium, provided the original author and source are credited.

**Funding:** The Structural Genomics Consortium is a registered charity (number 1097737) that receives funds from the Canadian Institutes for Health Research, the Canadian Foundation for Innovation, Genome Canada through the Ontario Genomics Institute, GlaxoSmithKline, Karolinska Institutet, the Knut and Alice Wallenberg Foundation, the Ontario Innovation Trust, the Ontario Ministry for Research and Innovation, Merck & Co., Inc., the Novartis Research Foundation, the Swedish Agency for Innovation Systems, the Swedish Foundation for Strategic Research and the Wellcome Trust. The funders had no role in study design, data collection and analysis, decision to publish, or preparation of the manuscript.

**Competing Interests:** The authors have declared that no competing interests exist.

\* E-mail: herwig.schuler@ki.se

<sup>‡</sup> Current address: Department of Biochemistry and Pharmacy, Åbo Akademi, Turku, Finland

## Introduction

The heat shock-70 proteins (Hsp70s) are chaperones involved in crucial cellular functions in all kingdoms of life. Hsp70-family function, structure, and mechanisms have been studied to great detail using cognate HSPA8/Hsc70 [1], stress-induced HSPA1/Hsp70-1/Hsp72 [2,3] the ER-resident HSPA5/Bip [4], and the bacterial ortholog, DnaK [5–7]. Hsp70 proteins bind and release client polypeptides in a cycle that is coupled to an ATPase activity [8]. The overall domain structure is conserved: The N-terminal nucleotide binding domain (NBD) with ATPase activity is joined by a flexible linker to the C-terminal peptide substrate binding domain (SBD). Alternation between the ATP state with low affinity and high exchange rates for clients and the ADP state with high affinity and low client exchange rates is tightly regulated by several classes of associated proteins, or cochaperones [9]. Allosteric communication with the SBD and interactions with cochaperones and nucleotide exchange factors all critically depend on the conformation of the NBD. Therefore, understanding the conformational changes in the NBDs of Hsp70 proteins is key to understanding how the ATPase motor drives the client binding and release cycle of the Hsp70 machine.

The human genome contains over 40 hsp70 sequences. Many of them are pseudogenes, but at least eleven distinct genes located on several chromosomes are translated into protein [9–11]. These Hsp70 isoforms differ from each other by amino acid sequence, expression levels, subcellular localization, and induction in response to different cues. Both constitutively expressed and stress-induced Hsp70 proteins have been identified [12]. Constitutively expressed Hsp70 chaperones have housekeeping functions such as the folding of nascent polypeptides, protein translocation between cellular compartments, degradation of unstable and misfolded proteins, and regulation of assembly and disassembly of protein complexes. Other Hsp70 members can be induced by various cellular stresses, such as heat stress, heavy metals, radiation, ischemia, nitric oxide radicals, or other stimuli that activate stress transcription factors. Stress induced Hsp70s prevent accumulation of stress denatured proteins.

Several of the human cytosolic Hsp70 isoforms have yet to be extensively characterized. Heat shock 70-like protein-1 (HSPA1L, also called Hsp70-hom or Hsp70t) is a constitutively expressed, non-inducible cytosolic protein with high abundance in testis [13,14]. Polymorphisms in the HSPA1L gene, predominantly in the region coding for the client binding domain, have been linked

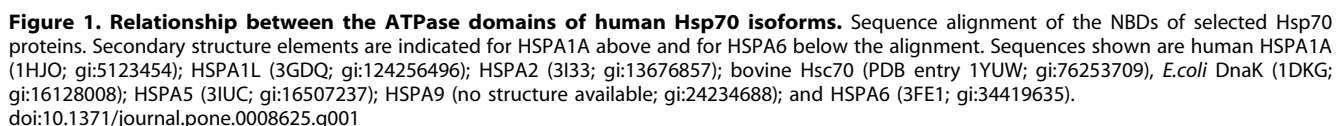

to disease [15,16]. HSPA2/Hsp70-2 is a constitutively expressed protein with high levels in testis [17,18]. HSPA2 is essential for maturation of male gametocytes [19] and is linked to male infertility [20,21]. While it is undetectable in many tissues HSPA2 is involved in cancer cell survival [22]. The HSPA6/Hsp70B' gene is strictly inducible with no detectable basal expression [23,24]. The HSPA6 protein is nuclear and cytosolic. HSPA6 induction is a sensitive biomarker of cellular stress; the protein appears transiently in response to heat stress whereas HSPA1A/Hsp72 levels persist for days [25].

The major Hsp70 protein of the endoplasmic reticulum is HSPA5, originally called immunoglobulin heavy chain binding protein (BiP), or glucose regulated protein-78 (GRP78) [26,27]. HSPA5 has crucial roles in the assembly of ER proteins and protein complexes and the unfolded protein response [28]. Both HSPA5 and its interaction partners are linked to a number of diseases including infectious diseases, inherited diseases, and several types of cancer [29–31].

Despite the large number of NBD crystal structures determined under different nucleotide conditions, the conformational changes that ultimately drive the Hsp70 chaperone machine have never been visualized by X-ray crystallography of NBDs alone. Instead, the NBDs all crystallized in a closed conformation that is interpreted as resembling the ATP-bound state. Only crystal complexes of NBDs and nucleotide exchange factors have yielded structures with a partially opened nucleotide binding cleft [32–36]. Also, the small cleft between subdomains IA and IB that is expected to adopt different opening states in allosteric regulation of the SBD [7] looks similar in all NBD crystal structures. We used X-ray crystallography to address the question whether previously less well characterized human Hsp70 isoforms might adopt different conformations in the absence of binding partners. We determined the structures of the ATPase domains of HSPA1L, HSPA2, HSPA5, and HSPA6. Despite different nucleotides and divalent cations present during protein purification and crystallization these structures are highly similar to the crystal structure of HSPA1A and other previously determined Hsp70 NBDs. HSPA5 crystallized with ADP and calcium in the active site, and with calcium bound to a secondary site, whereas we observed the products of ATP hydrolysis (ADP and inorganic phosphate) and a divalent cation in the active sites of the remaining structures. We conclude that in isolation, the ATPase domains of these human Hsp70 isoforms have rather similar properties to those of the previously determined isoforms.

## Results and Discussion

A common feature of Hsp70 ATPase domains is that, despite the large conformational changes they are predicted to undergo in their physiological context, their crystal structures are highly similar under different nucleotide conditions. We addressed the question whether this is also true for the NBDs of HSPA1L, HSPA2, HSPA5 and HSPA6. These share between 67 and 92% sequence identity with the NBD of the major stress inducible isoform, HSPA1A (Figure 1). We used a multiconstruct approach [37] to produce the NBDs of these human Hsp70 isoforms for structure determination by X-ray crystallography. We also produced the NBD of HSPA1A, the structure of which has been determined previously [38,39]. All five proteins were straightforward to produce in *E. coli*, although the soluble expression levels for HSPA5/BiP were relatively low.

Crystals of the five proteins were obtained with NBD constructs that contained either the full length N-terminus or short N-terminal truncations and with ADP and either  $Mg^{2+}$ - or  $Mn^{2+}$ -ions

present in the crystallization solution (Figure 2 and Table 1). Crystals diffracted to a resolution of between 1.8 and 2.2 Å except for the HSPA2 crystals which diffracted to 1.3 Å. The structures were solved by molecular replacement (Table 2). In all ATPase domains except for that of HSPA5/BiP the products of ATP hydrolysis, including inorganic phosphate, were observed. Examples of the electron density around the bound nucleotide are shown for HSPA2 and HSPA5 (Figure 3).

The overall structures of the four human Hsp70 ATPase domains that were determined here for the first time all closely resemble the structure of HSPA1A and related previously determined structures (Figure 4). The HSPA1A NBD structure determined by us was virtually identical with the HSPA1A NBD structure published previously (PDB entry 1HJO; [39]). The canonical Hsp70 fold, with the common placement of secondary structural elements, was also observed for HSPA5/BiP, the least conserved member of the five proteins studied by us (Figure 4A). Pairwise comparison among these NBDs shows that for ~70% of the backbone traces the rms difference is below 0.5 Å (Figure 4B). The largest rms deviation in the C $\alpha$  positions was found for HSPA5, where the overall rms value is higher than 1.3 Å (only 17% of the backbone trace shows an rms difference lower than 0.5 Å). To illustrate this we color coded the rmsd in C $\alpha$  atom positions between the pairs HSPA6 - HSPA1L, HSPA6 - HSPA5, and HSPA6 - *E.coli* DnaK, and mapped them onto the structure of HSPA6 (Figure 4C). This analysis shows that the most prominent difference between the HSPA5 and the canonical Hsp70 structures is a shift in subdomain IIB.

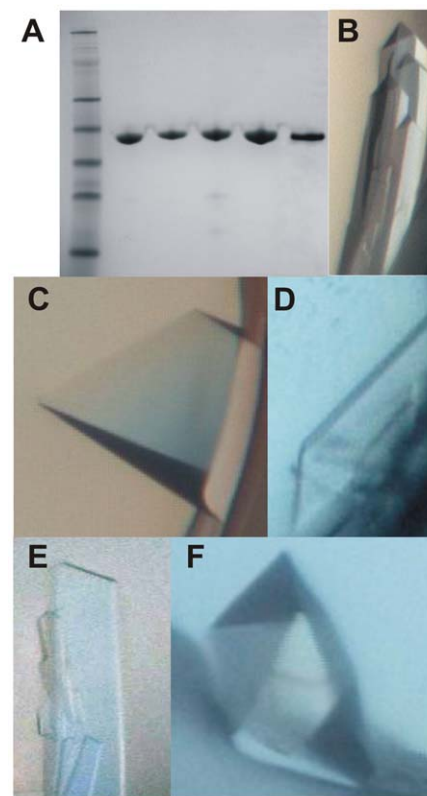

**Figure 2. Purification and crystallization of Hsp70 isoforms.** (A) Coomassie-stained SDS-polyacrylamide gel showing the purity of the crystallized proteins. (B–F) Examples of crystals grown under the conditions that yielded the datasets. (B) HSPA1A; (C) HSPA1L; (D) HSPA2; (E) HSPA5; (F) HSPA6.  
doi:10.1371/journal.pone.0008625.g002

**Table 1.** Summary of crystallization conditions.

|             | HSPA1A                  | HSPA1L                        | HSPA2                  | HSPA5                  | HSPA6                            |
|-------------|-------------------------|-------------------------------|------------------------|------------------------|----------------------------------|
| Salt        | 0.2M magnesium chloride | 0.2M trimethyl amine n-oxide  | 0.2M ammonium acetate  | 0.2M calcium chloride  | 0.1M disodium hydrogen phosphate |
| Buffer      | 0.1M Bis-Tris           | 0.1M Tris                     | 0.1M Bis-Tris          | 0.1M sodium acetate    | 0.1M citric acid                 |
| Precipitant | 25% PEG-3350            | 26% PEG monomethyl ether-2000 | 25% PEG-3350           | 20% PEG-6000           | 16% PEG-300                      |
| pH          | 5.5                     | 8.5                           | 5.5                    | 5                      | 3.2                              |
| Additive    | ADP, MgCl <sub>2</sub>  | ADP, MnCl <sub>2</sub>        | ADP, MgCl <sub>2</sub> | ADP, MgCl <sub>2</sub> | ADP, MgCl <sub>2</sub>           |
| Temperature | 4°C                     | 4°C                           | 4°C                    | 20°C                   | 20°C                             |

doi:10.1371/journal.pone.0008625.t001

**Table 2.** Summary of data acquisition and structure refinement details\*.

| Protein                                                            | HSPA1A                                  | HSPA1L                                        | HSPA2                                         | HSPA5                  | HSPA6                                             |
|--------------------------------------------------------------------|-----------------------------------------|-----------------------------------------------|-----------------------------------------------|------------------------|---------------------------------------------------|
| PDB entry                                                          | 3JXU                                    | 3GDQ                                          | 3I33                                          | 3IUC                   | 3FE1                                              |
| Search model                                                       | 1BA0                                    | 1BA0                                          | 3FE1                                          | 3I33                   | 2E88                                              |
| Ligand                                                             | ADP, PO <sub>4</sub> , Mg <sup>2+</sup> | ADP, PO <sub>4</sub> , Mn <sup>2+</sup> , GOL | ADP, PO <sub>4</sub> , Mg <sup>2+</sup> , GOL | ADP, Ca <sup>2+</sup>  | ADP, PO <sub>4</sub> , Mg <sup>2+</sup> , Cl, PGE |
| <b>Data collection</b>                                             |                                         |                                               |                                               |                        |                                                   |
| X-ray source                                                       | Cu-K $\alpha$ radiation                 | DIAMOND I03                                   | ESRF ID23-1                                   | BESSY 14.1             | BESSY 14.1                                        |
| Wavelength (Å)                                                     | 1.54166                                 | 0.98000                                       | 0.97930                                       | 0.91841                | 0.91841                                           |
| Space group                                                        | P212121                                 | P212121                                       | P212121                                       | P1                     | C121                                              |
| <b>Cell dimensions</b>                                             |                                         |                                               |                                               |                        |                                                   |
| <i>a</i> , <i>b</i> , <i>c</i> (Å)                                 | 46.013, 63.298, 144.197                 | 70.07, 70.7, 97.5                             | 48.180, 78.6, 93.99                           | 48.212, 51.795, 94.994 | 236.45, 105.4, 73.59                              |
| $\alpha$ , $\beta$ , $\gamma$ (°)                                  | 90, 90, 90                              | 90, 90, 90                                    | 90, 90, 90                                    | 98.85, 94.88, 117.61   | 90, 101.04, 90                                    |
| Resolution (Å)                                                     | 26.43–2.14 (2.24–2.14)                  | 25.0–1.8 (1.85–1.8)                           | 26.26–1.3 (1.39–1.3)                          | 35.0–2.13 (2.13–2.19)  | 35.0–2.2 (2.28–2.2)                               |
| R <sub>merge</sub>                                                 | 0.093 (0.297)                           | 0.07 (0.2)                                    | 0.136 (0.266)                                 | 0.13 (0.8)             | 0.12 (0.6)                                        |
| I/ $\sigma$ (I)                                                    | 20.6 (6.87)                             | 27.9 (9.36)                                   | 11.6 (0.5)                                    | 11.42 (2.9)            | 10.54 (2.8)                                       |
| Completeness (%)                                                   | 98.3 (88.8)                             | 99.3 (93.2)                                   | 99.2 (99.3)                                   | 94.4 (95.3)            | 98.6 (98.1)                                       |
| Redundancy                                                         | 12.7 (8.45)                             | 13.7 (7.9)                                    | 6.9 (7.0)                                     | 3.8 (3.7)              | 3.9 (3.9)                                         |
| <b>Refinement</b>                                                  |                                         |                                               |                                               |                        |                                                   |
| Resolution (Å)                                                     | 10.54–2.14                              | 23.83–1.8                                     | 25.56–1.3                                     | 29.12–2.4              | 33.69–2.2                                         |
| No. reflections                                                    | 22346                                   | 42856                                         | 83300                                         | 28620                  | 88609                                             |
| R <sub>work</sub> <sup>†</sup> /R <sub>free</sub> <sup>‡</sup> (%) | 20.9/26.4                               | 17.2/20.2                                     | 18.4/19.9                                     | 19.4/27.0              | 20.1/23.8                                         |
| Molecules/a.u.                                                     | 1                                       | 1                                             | 1                                             | 2                      | 3                                                 |
| <b>No. atoms</b>                                                   |                                         |                                               |                                               |                        |                                                   |
| Protein                                                            | 2930                                    | 2936                                          | 2934                                          | 5912                   | 8868                                              |
| Ligands                                                            | 33                                      | 39                                            | 39                                            | 58                     | 110                                               |
| Water                                                              | 202                                     | 309                                           | 345                                           | 399                    | 333                                               |
| <b>B-factors (Å<sup>2</sup>)</b>                                   |                                         |                                               |                                               |                        |                                                   |
| Protein                                                            | 19.26                                   | 19.73                                         | 12.29                                         | 22.0                   | 25.45                                             |
| Ligands                                                            | 11.89                                   | 12.84                                         | 8.2                                           | 12.34                  | 19.78                                             |
| Water                                                              | 21.35                                   | 26.91                                         | 22.32                                         | 24.29                  | 25.8                                              |
| <b>R.m.s. deviations</b>                                           |                                         |                                               |                                               |                        |                                                   |
| Bond lengths (Å)                                                   | 0.013                                   | 0.012                                         | 0.007                                         | 0.016                  | 0.013                                             |
| Bond angles (°)                                                    | 1.415                                   | 1.367                                         | 1.212                                         | 1.588                  | 1.38                                              |
| <b>Ramachandran plot (%)</b>                                       |                                         |                                               |                                               |                        |                                                   |
| Favored regions                                                    | 98.1                                    | 99.2                                          | 99.1                                          | 98.4                   | 98.5                                              |
| Additionally allowed regions                                       | 1.9                                     | 0.8                                           | 0.9                                           | 1.6                    | 1.5                                               |

\*Values for the highest resolution shell are shown in parentheses.

<sup>†</sup>R<sub>work</sub> is defined as  $\sum ||F_{obs}| - |F_{calc}|| / \sum |F_{obs}|$ , where  $F_{obs}$  and  $F_{calc}$  are observed and calculated structure-factor amplitudes, respectively.<sup>‡</sup>R<sub>free</sub> is the R factor for the test set (5–10% of the data).

doi:10.1371/journal.pone.0008625.t002

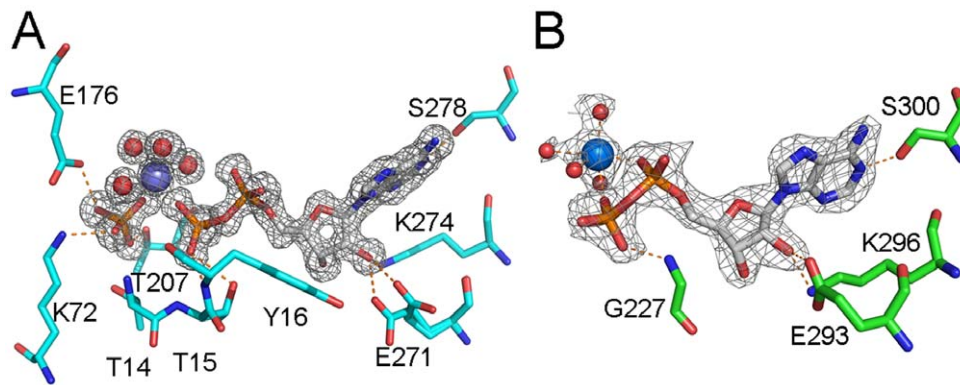

**Figure 3. Electron density around the nucleotide in the NBDs of HSPA2 and HSPA5.** Representative parts of the  $2F_{\text{obs}} - F_{\text{calc}}$  density maps around the nucleotide binding site (contoured at  $1.5\sigma$  above the mean) of (A) HSPA2 with MgADP +  $P_i$  and (B) HSPA5 with CaADP. Selected side chain and main chain atoms within hydrogen bonding distance are indicated. doi:10.1371/journal.pone.0008625.g003

The slightly opened nucleotide binding cleft of ADP-bound HSPA5 distinguishes it from the set of NBDs that crystallized with ADP and inorganic phosphate in the active site. Cleft opening in HSPA5 is brought about by rotation of subdomain IIB by approximately  $5.8^\circ$ , as determined using the DynDom server [40]. This mechanism of cleft opening is similar to that determined by crystallography of Hsp70 proteins in complex with nucleotide exchange factors [32–35], but differs from that observed for actin [41].

All five NBDs crystallized in the presence of ADP and either  $\text{MgCl}_2$  or  $\text{MnCl}_2$  (Table 1). Inorganic phosphate was present only in the solution for HSPA6. Nevertheless, electron density for inorganic phosphate was observed in the active site of four of these proteins (Table 2), which thus had the products of ATP hydrolysis bound to them. We conclude that at least HSPA1A, HSPA1L, and HSPA2 bound ATP in the expression host, hydrolyzed their bound ATP, and subsequently during crystallization never released the products of ATP hydrolysis into solution. Only the HSPA5 structure contained ADP and metal ion but not inorganic phosphate. Metal ion coordination geometry and distances suggested that here the bound divalent cation was calcium, which was present in the mother liquor. Thus HSPA5 may have lost magnesium and inorganic phosphate after cation exchange for calcium during crystallization.

A second calcium ion was found at the base of HSPA5  $\alpha$ -helix-6, tethered by the H252 hydroxyl and the E256 and D257 carboxylates. This site has previously been identified in human HSPA1 (1S3X) [38]. Conservation of the side chains involved in  $\text{Ca}^{2+}$ -interactions in human and many other Hsp70s suggests a universal binding site, but to our knowledge no other crystal structures of any Hsp70 protein contain  $\text{Ca}^{2+}$  at this site. Given the millimolar concentrations of calcium in the ER we expect that HSPA5 may be partially regulated at the second site found in our crystal structure, whether in relation to ATP turnover or other activities [31]. Interestingly, this second metal binding site is implicated in ATP synthesis by mutagenesis of HSPA1 [42]. ATP synthesis was found to be dependent on both calcium ions and transient Hsp70 phosphorylation [42]. Also, both DnaK [43] and HSPA5 [44] are transiently phosphorylated, in a  $\text{Ca}^{2+}$ -dependent manner, on the threonine side chain corresponding to HSPA5 T229. We speculate that HSPA5 and possibly other family members might be able to retain the products of ATP hydrolysis for ATP regeneration at a site in close proximity to the active site. The second calcium site might position the ADP pyrophosphate tail

for phosphoester bond formation, while phosphorylated T229 (or an alternative side chain in the vicinity, such as strictly conserved HSPA5<sup>T251</sup>/DnaK<sup>T225</sup>) might act as phosphate donor. This pathway might be employed in situations of high ATP turnover or low ATP concentrations to secure vital cellular functions.

## Materials and Methods

### Protein Expression and Purification

The cDNAs coding for the full-length human HSPA1A, HSPA1L, HSPA2, HSPA5, and HSPA6 were obtained from the Mammalian Gene Collection (accession codes BC002453, BC034483, BC001752, BC020235, and BC035665, respectively). The sequence coding for residues HSPA1A<sup>M1-N387</sup>, HSPA1L<sup>M1-K386</sup>, HSPA2<sup>P6-D386</sup>, HSPA5<sup>D26-D410</sup>, and HSPA6<sup>E6-D385</sup> were subcloned into expression vector pNIC-Bsa4 by ligation-independent cloning. The resulting expression constructs contained a hexahistidine tag and a TEV-protease cleavage site (MHHHHHHSSGVDLG<sup>+</sup>TENLYFQS) at the N-termini.

Recombinant expression and purification of the proteins is described in detail on our webpage (<http://www.thesgc.org/structures/>). Briefly, each expression construct was transformed into *E. coli* strain BL21(DE3)R3 pRARE (Novagen) and the cultures were grown in Terrific Broth supplemented with 8 g/l of glycerol at  $37^\circ\text{C}$ . At an absorbance at 600 nm between 1 and 2 the temperature was lowered to  $18^\circ\text{C}$ , recombinant protein production was induced by addition of 0.5 mM isopropyl- $\beta$ -D-thiogalactopyranoside, and cell growth was continued for 18 h at  $18^\circ\text{C}$ . Cells were harvested by centrifugation and the cell pellets were resuspended in 1.5 volumes/wet cell weight of lysis buffer (100 mM HEPES, 500 mM NaCl, 10% glycerol, 10 mM imidazole, 0.5 mM TCEP, pH 8.0, and one tablet of Complete EDTA-free protease inhibitor (Roche Biosciences) per 50 ml cell suspension). Before lysis, 4  $\mu\text{l}$  (1000 U) of Benzonase (Novagen) was added per 50 ml cell suspension, and lysis was achieved by sonication. Cell debris was removed by centrifugation and the soluble fractions were filtered through a syringe filter (0.45  $\mu\text{m}$  pore size). Cleared lysates were passed over 1-ml HiTrap Chelating columns (GE Healthcare) pre-equilibrated with buffer 1 (30 mM Hepes, 500 mM NaCl, 10% glycerol, 10 mM imidazole, pH 7.5, 0.5 mM TCEP). The columns were washed sequentially with buffer 1 and buffer 1 supplemented with 25 mM imidazole. Bound protein was eluted with buffer 1

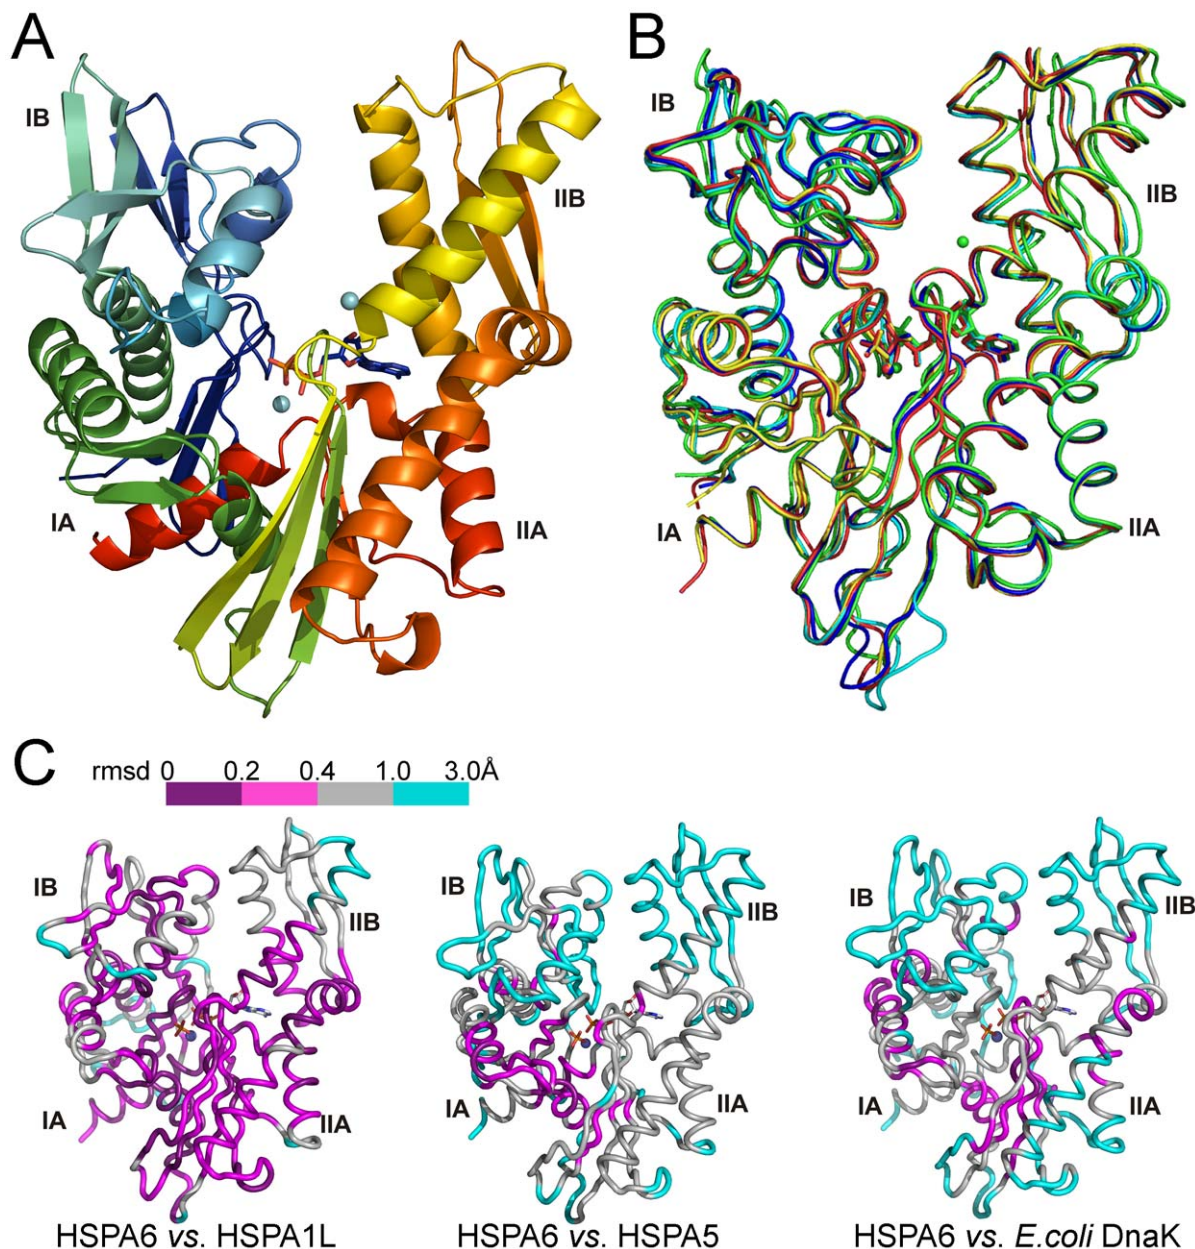

**Figure 4. Crystal structures of the human Hsp70 ATPase domains.** (A) The structure of the HSPA5/BiP NBD in complex with CaADP at 2.4 Å resolution. (B) Superposition of the five Hsp70 NBD structures determined in this study. Dark blue, HSPA1A; yellow, HSPA1L; cyan, HSPA2; red, HSPA6; green, HSPA5/BiP. (C) Cartoon representation of HSPA6, colored to illustrate rms differences in Cα-positions between HSPA6 and HSPA1L (left), HSPA6 and HSPA5 (center), and HSPA6 and DnaK (right).  
doi:10.1371/journal.pone.0008625.g004

containing 500 mM imidazole, loaded onto 16/60 Superdex-200 HiLoad columns (GE Healthcare), and gel filtration was performed in buffer 2 (30 mM Hepes, 300 mM NaCl, 10% glycerol, pH 7.5, 0.5 mM TCEP). Fractions were pooled based on gel filtration profiles and purity, TCEP was added to 2 mM, and the proteins were concentrated to 24.8 mg/ml (HSPA1A), 16.0 mg/ml (HSPA1L), 14.0 mg/ml (HSPA2), 31.0 mg/ml (HSPA5A), and 25.0 mg/ml (HSPA6). Proteins were typically more than 90% pure judged by SDS-PAGE analysis (Figure 2A). Protein construct masses were verified by TOF-MS analysis (results not shown). Aliquots were flash-frozen and stored at -80°C.

#### Crystallization, Data Collection, Structure Solution and Refinement

Crystallization methods and conditions are summarized in Table 1. Crystals appeared after 2–28 days. For data collection crystals were briefly dipped in cryo solution containing 40% PEG 300, 0.15M Na<sub>2</sub>HPO<sub>4</sub>, 0.1M citric acid, 0.2M NaCl (HSPA6) or mother liquor containing 15%–20% glycerol (HSPA1A, HSPA1LA, HSPA2, and HSPA5) and flash-frozen in liquid nitrogen.

A single wavelength dataset for HSPA1A was collected with Cu-Kα radiation (1.54166 Å) on an X8 PROTEUM system equipped with a four-circle Kappa goniostat and a PLATINUM-

135 CCD (all from Bruker AXS, Delft, Netherlands). SAINT (Bruker AXS) and XPREF (Bruker AXS) were used to process the data. Further datasets were collected at synchrotron beamlines at BESSY (BL14-1), Berlin, Germany (HSPA5 and HSPA6), DIAMOND (I03), Oxfordshire, UK (HSPA1L) and ESRF (ID23-1), Grenoble, France (HSPA2). Data sets were indexed, scaled, and reduced using the programs XDS [45] and SCALA [46]. All structures were solved by molecular replacement using MOLREP [47]. The structures were refined with RefMac5 [48] and model building was done using Coot [49]. For further details on data processing and refinement statistics, see Table 2. Geometry of the models was analyzed with Molprobit [50]. Sequence alignments were obtained using ESPript [51].

## Data Deposition

The atomic coordinates and structure factors have been deposited with the Protein Data Bank, www.rcsb.org (PDB entry codes: 3FE1 [HSPA6]; 3GDQ [HSPA1L]; 3I33 [HSPA2]; 3IUC [HSPA5]; 3JXU [HSPA1A]).

## Supporting Information

**Datapak S1** Standalone iSee datapack - contains the enhanced version of this article for use offline. This file can be opened using

## References

- Flaherty KM, DeLuca-Flaherty C, McKay DB (1990) 3-Dimensional Structure of the Atpase Fragment of a 70k Heat-Shock Cognate Protein. *Nature* 346: 623–628.
- Michels AA, Kanon B, Konings AWT, Ohtsuka K, Bensaude O, et al. (1997) Hsp70 and Hsp40 chaperone activities in the cytoplasm and the nucleus of mammalian cells. *J Biol Chem* 272: 33283–33289.
- Rudiger S, Buchberger A, Bukau B (1997) Interaction of Hsp70 chaperones with substrates. *Nature Struct Biol* 4: 342–349.
- Wei JY, Hendershot LM (1995) Characterization of the Nucleotide-Binding Properties and Atpase Activity of Recombinant Hamster Bip Purified from Bacteria. *J Biol Chem* 270: 26670–26676.
- Buchberger A, Theysen H, Schroder H, McCarty JS, Virgallita G, et al. (1995) Nucleotide-Induced Conformational-Changes in the Atpase and Substrate-Binding Domains of the Dnak Chaperone Provide Evidence for Interdomain Communication. *J Biol Chem* 270: 16903–16910.
- Zhu XT, Zhao X, Burkholder WF, Gragerov A, Ogata CM, et al. (1996) Structural analysis of substrate binding by the molecular chaperone DnaK. *Science* 272: 1606–1614.
- Bertelsen EB, Chang L, Gestwicki JE, Zuiderweg ERP (2009) Solution conformation of wild-type E. coli Hsp70 (DnaK) chaperone complexed with ADP and substrate. *Proc Natl Acad Sci U S A* 106: 8471–8476.
- Mayer MP, Bukau B (2005) Hsp70 chaperones: Cellular functions and molecular mechanism. *Cell Mol Life Sci* 62: 670–684.
- Vos MJ, Hageman J, Carra S, Kampinga HH (2008) Structural and functional diversities between members of the human HSPB, HSPH, HSPA, and DNAJ chaperone families. *Biochemistry* 47: 7001–7011.
- Brocchieri L, de Macario EC, Macario AJL (2008) hsp70 genes in the human genome: Conservation and differentiation patterns predict a wide array of overlapping and specialized functions. *BMC Evol Biol* 8(19).
- Kabani M, Martineau CN (2008) Multiple Hsp70 isoforms in the eukaryotic cytosol: Mere redundancy or functional specificity? *Curr Genom* 9: 338–348.
- Daugaard M, Rohde M, Jaattela M (2007) The heat shock protein 70 family: Highly homologous proteins with overlapping and distinct functions. *FEBS Lett* 581: 3702–3710.
- Milner CM, Campbell RD (1990) Structure and Expression of the 3 Mhc-Linked Hsp70 Genes. *Immunogenetics* 32: 242–251.
- Sargent CA, Dunham I, Trowsdale J, Campbell RD (1989) Human Major Histocompatibility Complex Contains Genes for the Major Heat-Shock Protein-Hsp70. *Proc Natl Acad Sci U S A* 86: 1968–1972.
- Ishihara M, Ohno S, Ishida T, Mizuki N, Ando H, et al. (1995) Genetic Polymorphisms of the Tnfb and Hsp70 Genes Located in the Human Major Histocompatibility Complex in Sarcoidosis. *Tissue Antigens* 46: 59–62.
- Spagnolo P, Sato H, Marshall SE, Antoniou KM, Ahmad T, et al. (2007) Association between heat shock protein 70/Hom genetic polymorphisms and uveitis in patients with sarcoidosis. *Inv Opth Vis Sci* 48: 3019–3025.
- Son WY, Hwang SH, Han CT, Lee JH, Kim S, et al. (1999) Specific expression of heat shock protein HspA2 in human male germ cells. *Mol Hum Reprod* 5: 1122–1126.
- Govin J, Caron C, Escoffier E, Ferro M, Kuhn L, et al. (2006) Post-meiotic shifts in HSPA2/HSP70.2 chaperone activity during mouse spermatogenesis. *J Biol Chem* 281: 37888–37892.
- Zhu D, Dix DJ, Eddy EM (1997) HSP70-2 is required for CDC2 kinase activity in meiosis I of mouse spermatocytes. *Development* 124: 3007–3014.
- Feng HL, Sandlow JI, Sparks AET (2001) Decreased expression of the heat shock protein hsp70-2 is associated with the pathogenesis of male infertility. *Fertil Steril* 76: 1136–1139.
- Sasaki T, Marcon E, McQuire T, Arai Y, Moens PB, et al. (2008) Bat3 deficiency accelerates the degradation of Hsp70-2/HspA2 during spermatogenesis. *J Cell Biol* 182: 449–458.
- Rohde M, Daugaard M, Jensen MH, Helin K, Nylandsted J, et al. (2005) Members of the heat-shock protein 70 family promote cancer cell growth by distinct mechanisms. *Genes Dev* 19: 570–582.
- Leung TKC, Rajendran MY, Monfries C, Hall C, Lim L (1990) The Human Heat-Shock Protein Family - Expression of a Novel Heat-Inducible Hsp70 (Hsp70b') and Isolation of Its Cdna and Genomic DNA. *Biochem J* 267: 125–132.
- Leung TKC, Hall C, Rajendran M, Spurr NK, Lim L (1992) The Human Heat-Shock Genes Hspa6 and Hspa7 Are Both Expressed and Localize to Chromosome-1. *Genomics* 12: 74–79.
- Noonan EJ, Place RF, Giardina C, Hightower LE (2007) Hsp70b' regulation and function. *Cell Stress Chaperones* 12: 219–229.
- Ting J, Lee AS (1988) Human-Gene Encoding the 78,000-Dalton Glucose-Regulated Protein and Its Pseudogene - Structure, Conservation, and Regulation. *DNA* 7: 275–286.
- Hendershot LM, Valentine VA, Lee AS, Morris SW, Shapiro DN (1994) Localization of the Gene Encoding Human Bip/Grp78, the Endoplasmic-Reticulum Cognate of the Hsp70 Family, to Chromosome-9q34. *Genomics* 20: 281–284.
- Brewer JW, Hendershot LM (2005) Building an antibody factory: a job for the unfolded protein response. *Nature Immunol* 6: 23–29.
- Fu Y, Li JZ, Lee AS (2007) GRP78/BiP inhibits endoplasmic reticulum BIK and protects human breast cancer cells against estrogen starvation-induced apoptosis. *Cancer Res* 67: 3734–3740.
- Dong DZ, Ni M, Li JZ, Xiong SG, Ye W, et al. (2008) Critical role of the stress chaperone GRP78/BiP in tumor proliferation, survival, and tumor angiogenesis in transgene-induced mammary tumor development. *Cancer Res* 68: 498–505.
- Dudek J, Benedix J, Cappel S, Greiner M, Jalal C, et al. (2009) Functions and pathologies of BiP and its interaction partners. *Cell Mol Life Sci* 66: 1559–1569.
- Sondermann H, Scheufler C, Schneider C, Hohfeld J, Hartl FU, et al. (2001) Structure of a Bag/Hsc70 complex: Convergent functional evolution of Hsp70 nucleotide exchange factors. *Science* 291: 1553–1557.
- Polier S, Dragovic Z, Hartl FU, Bracher A (2008) Structural basis for the cooperation of Hsp70 and Hsp110 chaperones in protein folding. *Cell* 133: 1068–1079.
- Schuermann JP, Jiang JW, Cuellar J, Llorca O, Wang LP, et al. (2008) Structure of the Hsp110: Hsc70 nucleotide exchange machine. *Mol Cell* 31: 232–243.

free software available for download at [http://www.molsoft.com/icm\\_browser.html](http://www.molsoft.com/icm_browser.html).

Found at: doi:10.1371/journal.pone.0008625.s001 (ICB)

**Text S1** Instructions for installation and use of the required web plugin (to access the online enhanced version of this article).

Found at: doi:10.1371/journal.pone.0008625.s002 (0.75 MB PDF)

## Acknowledgments

We gratefully acknowledge the beamline personnel of the BESSY (Berlin, Germany), Diamond (Oxford, United Kingdom), and ESRF (Grenoble, France) synchrotron radiation facilities. We thank Wen Wha Lee (SGC, Oxford University) for assistance in the generation of the iSee datapack (Datapak S1) for the online version of this article.

## Author Contributions

Conceived and designed the experiments: MW HS. Performed the experiments: MW TK LL IJ TK MM. Analyzed the data: MW TK LL HS. Wrote the paper: MW HS.

35. Xu Z, Page RC, Gomes MM, Kohli E, Nix JC, et al. (2008) Structural basis of nucleotide exchange and client binding by the Hsp70 cochaperone Bag2. *Nat Struct Mol Biol* 15: 1309–1317.
36. Hendrickson WA, Liu QL (2008) Exchange we can believe in. *Structure* 16: 1153–1155.
37. Gräslund S, Sagemark J, Berglund H, Dahlgren LG, Flores A, et al. (2008) The use of systematic N- and C-terminal deletions to promote production and structural studies of recombinant proteins. *Protein Expr Purif* 58: 210–221.
38. Sriram M, Osipiuk J, Freeman BC, Morimoto RI, Joachimiak A (1997) Human Hsp70 molecular chaperone binds two calcium ions within the ATPase domain. *Structure* 5: 403–414.
39. Osipiuk J, Walsh MA, Freeman BC, Morimoto RI, Joachimiak A (1999) Structure of a new crystal form of human Hsp70 ATPase domain. *Acta Crystallogr D Biol Crystallogr* 55: 1105–1107.
40. Qi G, Lee R, Hayward S (2005) A comprehensive and non-redundant database of protein domain movements. *Bioinformatics* 21: 2832–2838.
41. Page R, Lindberg U, Schutt CE (1998) Domain motions in actin. *J Mol Biol* 280: 463–474.
42. Wu X, Yano M, Washida H, Kido H (2004) The second metal-binding site of 70 kDa heat-shock protein is essential for ADP binding, ATP hydrolysis and ATP synthesis. *Biochem J* 378: 793–799.
43. McCarty JS, Walker GC (1991) DnaK as a thermometer: threonine-199 is site of autophosphorylation and is critical for ATPase activity. *Proc Natl Acad Sci U S A* 88: 9513–9517.
44. Gaut JR, Hendershot LM (1993) The immunoglobulin-binding protein in vitro autophosphorylation site maps to a threonine within the ATP binding cleft but is not a detectable site of in vivo phosphorylation. *J Biol Chem* 268: 12691–12698.
45. Kabsch W (1993) Automatic processing of rotation diffraction data from crystals of initially unknown symmetry and cell constants. *J Appl Cryst* 26: 795–800.
46. Evans P (2006) Scaling and assessment of data quality. *Acta Crystallogr D Biol Crystallogr* 62: 72–82.
47. Vagin A, Teplyakov A (2000) An approach to multi-copy search in molecular replacement. *Acta Crystallogr D Biol Crystallogr* 56: 1622–1624.
48. Murshudov GN, Vagin A, Dodson EJ (1997) Refinement of macromolecular structures by the maximum-likelihood method. *Acta Crystallogr D Biol Crystallogr* 53: 240–255.
49. Emsley P, Cowtan K (2004) Coot: model-building tools for molecular graphics. *Acta Crystallogr D Biol Crystallogr* 60: 2126–2132.
50. Davis IW, Murray LW, Richardson JS, Richardson DC (2004) MOLPROBITY: structure validation and all-atom contact analysis for nucleic acids and their complexes. *Nucleic Acids Res* 32: W615–W619.
51. Gouet P, Courcelle E, Stuart DI, Metoz F (1999) ESPript: analysis of multiple sequence alignments in PostScript. *Bioinformatics* 15: 305–308.
